# Supplementary material for: Cancer incidence and mortality in China, 2022
Source: PubMed Central journal article supplement — J Natl Cancer Cent. 2024 Feb 2;4(1):47–53. doi: 10.1016/j.jncc.2024.01.006 (PMC11256708; doi:10.1016/j.jncc.2024.01.006), 2024-02-02
Supplement: mmc1.pdf [file mmc1.pdf]

## Supplementary materials

### Cancer incidence and mortality in China, 2022

Bingfeng Han, Rongshou Zheng, Hongmei Zeng, Shaoming Wang, Kexin Sun, Ru Chen, Li Li, Wenqiang Wei, Jie He

#### Supplementary Table 1

List of population-based cancer registries in China used for temporal trends.

| No. | Province     | Registry                 |
|-----|--------------|--------------------------|
| 1   | Beijing      | Beijing                  |
| 2   | Hebei        | Cixian                   |
| 3   | Liaoning     | Dalian                   |
| 4   |              | An'shan                  |
| 5   | Heilongjiang | Nangang District, Harbin |
| 6   | Shanghai     | Shanghai                 |
| 7   | Jiangsu      | Qidong                   |
| 8   |              | Huaian District, Huai'an |
| 9   |              | Yangzhong                |
| 10  | Zhejiang     | Hangzhou                 |
| 11  |              | Jiaxing                  |
| 12  |              | Jiashan                  |
| 13  |              | Haining                  |
| 14  | Fujian       | Changle                  |
| 15  | Shandong     | Linqu                    |
| 16  |              | Feicheng                 |
| 17  | Henan        | Linzhou                  |
| 18  | Hubei        | Wuhan                    |
| 19  | Guangdong    | Guangzhou                |
| 20  |              | Sihui                    |
| 21  |              | Zhongshan                |
| 22  | Sichuan      | Yanting                  |

**Supplementary Table 2**

Segi's world standard population.

| Age group, years | Segi's population |
|------------------|-------------------|
| 0~               | 12 000            |
| 5~               | 10 000            |
| 10~              | 9000              |
| 15~              | 9000              |
| 20~              | 8000              |
| 25~              | 8000              |
| 30~              | 6000              |
| 35~              | 6000              |
| 40~              | 6000              |
| 45~              | 6000              |
| 50~              | 5000              |
| 55~              | 4000              |
| 60~              | 4000              |
| 65~              | 3000              |
| 70~              | 2000              |
| 75~              | 1000              |
| 80~              | 500               |
| 85+              | 500               |
| Total            | 100 000           |
